# Supplementary material
Source: PubMed Central journal article supplement (PMC8101928)
Supplement: ehp7612.s001.acco.pdf [file ehp7612.s001.acco.pdf]

**Note to readers with disabilities:** *EHP* strives to ensure that all journal content is accessible to all readers. However, some figures and Supplemental Material published in *EHP* articles may not conform to [508 standards](#) due to the complexity of the information being presented. If you need assistance accessing journal content, please contact [ehp508@niehs.nih.gov](mailto:ehp508@niehs.nih.gov). Our staff will work with you to assess and meet your accessibility needs within 3 working days.

### **Supplemental Material**

#### **The Kidney-Related Effects of Polystyrene Microplastics on Human Kidney Proximal Tubular Epithelial Cells HK-2 and Male C57BL/6 Mice**

Yung-Li Wang, Yu-Hsuan Lee, Yung-Ho Hsu, I-Jen Chiu, Cathy Chia-Yu Huang, Chih-Chia Huang, Zi-Chun Chia, Chung-Pei Lee, Yuh-Feng Lin, and Hui-Wen Chiu

#### **Table of Contents**

**Table S1.** Physical characteristics of PS-MPs.

**Table S2.** The estimated concentrations of PS-MPs in each kidney.

**Table S3.** The mean and SD summary data for quantification.

**Table S4.** P-values for non-statistically and statistically significant results.

**Table S5.** The quantification of IHC or staining analysis.

**Figure S1. PS-MPs characterization.** The diameter of PS-MPs was detected with TEM.

**Figure S2. Representative Western blots evaluating Bax, Bad, and Bcl2 in HK-2 cells treated with PS-MPs** Bad, Bcl2 and Bax were assessed after PS-MPs treatment at a concentration of 0.8 mg/ml for 0, 5, 10, 20, 30, 60 min. The mean and SD summary data for quantification of Western blots are shown in Table S3.

**Figure S3. Quantification of Western blots evaluating IRE1 $\alpha$ , ATF6, and p-EIF2 $\alpha$  in HK-2 cells treated with PS-MPs.** ER stress-related proteins IRE1 $\alpha$ , ATF6, p-EIF2 $\alpha$ , and EIF2 $\alpha$ , were assessed after PS-MPs treatment at concentrations of 0.05, 0.1, 0.2, 0.4 and 0.8 mg/ml for 24 h. The Western blotting results were graphed and statistically analyzed. (A) IRE1 $\alpha$ /GAPDH ratio. (B) ATF6/GAPDH ratio. (C) p-EIF2 $\alpha$ / EIF2 $\alpha$  ratio. N=3. Data are presented as the mean  $\pm$  SD. \*P < 0.05 compared with control group as determined by one-way ANOVA with Dunnett's multiple comparison test, IRE1 $\alpha$ /GAPDH, 0 mg/ml group vs 0.8 mg/ml group. The mean and SD summary data for quantification of Western blots are shown in Table S3. The actual P-values for non-statistically and statistically significant results are shown in Table S4.

**Figure S4. Quantification of Western blots evaluating the phosphorylation of MAPK signaling pathway components ERK1/2, JNK, and p38 in HK-2 cells treated with PS-MPs.** MAPK signaling pathway components, such as p-ERK1/2, ERK1/2, p-JNK, JNK, p-p38 and, p38, were assessed after PS-MPs treatment at a concentration of 0.8 mg/ml for 0, 5, 10, 20, 30, 60 min. The Western blotting results were graphed and statistically analyzed. (A) p-ERK1/2/ERK1/2 ratio, N=3. (B) p-JNK/JNK ratio, N=3. (C) p-p38/ p-p38 ratio, N=2. Data are presented as the mean  $\pm$  SD. \*P < 0.05, \*\*P < 0.01, and \*\*\*P < 0.001 compared with control group as determined by one-way ANOVA with Dunnett's multiple comparison test. The mean and SD summary data for quantification of Western blots are shown in Table S3. The actual P-values for non-statistically and statistically significant results have shown in Table S4.

**Figure S5. Quantification of Western blots evaluating cPLA2 and COX-1 in HK-2 cells treated with PS-MPs.** Inflammation-related proteins cPLA2 and COX-1, were assessed after PS-MPs treatment at concentrations of 0.05, 0.1, 0.2, 0.4 and 0.8 mg/ml for 24 h. The Western blotting results were graphed and statistically analyzed. (A) cPLA2/GAPDH ratio. (B) COX-1/GAPDH ratio. N=3. Data are presented as the mean  $\pm$  SD. \*P < 0.05 compared with control group as determined by one-way ANOVA with Dunnett's multiple comparison test. The mean and SD summary data for quantification of Western blots are shown in Table S3. The actual P-values for non-statistically and statistically significant results have shown in Table S4.

**Figure S6. Quantification of Western blots evaluating the phosphorylation of mTOR and Akt in HK-2 cells treated with PS-MPs.** AKT/mTOR signaling pathway components, such as p-mTOR, mTOR, p-AKT, and AKT, were assessed after PS-MPs treatment at concentrations of 0.05, 0.1, 0.2, 0.4 and 0.8 mg/ml for 1 h. The Western blotting results were graphed and statistically analyzed. (A) p-mTOR/mTOR ratio. (B) p-AKT/AKT ratio. N=2. Data are presented as the mean  $\pm$  SD. \*P < 0.05 compared with control group as determined by one-way ANOVA with Dunnett's multiple comparison test. The mean and SD summary data for quantification of Western blots are shown in Table S3. The actual P-values for non-statistically and statistically significant results have shown in Table S4.

**Figure S7. Quantification of Western blots evaluating the expression of p62, Beclin 1, and LC3 in HK-2 cells treated with PS-MPs.** Autophagy-related proteins p62, Beclin 1, and LC3, were assessed after PS-MPs treatment at concentrations of 0.05, 0.1, 0.2, 0.4 and 0.8 mg/ml for 24 h. The Western blotting results were graphed and statistically analyzed. (A) p62/GAPDH ratio. (B) Beclin 1/GAPDH ratio. (B) LC3-II/LC3-I ratio. N=3. Data are presented as the mean  $\pm$  SD. \*P < 0.05, \*\*P < 0.01, and \*\*\*P < 0.001 compared with control group as determined by one-way ANOVA with Dunnett's multiple comparison test. The mean and SD summary data for quantification of Western blots are shown in Table S3. The actual P-values for non-statistically and statistically significant results have shown in Table S4.

**Figure S8. Quantification of Western blots evaluating the expression Bad, IRE1 $\alpha$ , p-ERK1/2, p-mTOR, and LC3-II/LC3-I ratio in HK-2 cells treated with PS-MPs alone, MitoTEMPO alone or in combination.** (A) Cells were pretreated for 1 h with MitoTEMPO (100  $\mu$ M) then exposed to PS-MPs (0.8 mg/ml) for 20 min. Mitochondrial-mediated apoptosis protein Bad was assessed. (B) Cells were pretreated for 1 h with MitoTEMPO and then exposed to PS-MPs for 24 h. ER stress-related protein IRE1 $\alpha$  was assessed. (C) Cells were pretreated for 1 h with MitoTEMPO for 12 h and exposed to PS-MPs for 30 min. MAPK signaling pathway component p-ERK1/2 and ERK1/2 was assessed. (D) Cells were pretreated for 1 h with MitoTEMPO and then exposed to PS-MPs for 1 h. AKT/mTOR pathway components p-mTOR and mTOR were assessed. (E) Cells were pretreated for 1 h with MitoTEMPO for 1 h and then exposed to 0.8 mg/ml PS-MPs for 24 h. Autophagy-related protein LC3 was assessed. The Western blotting results were graphed and statistically analyzed. N=2. Data are presented as the mean  $\pm$  SD. \*P < 0.05 compared with control group as determined by t test. PS-MPs 0.8 mg/ml group vs MitoTEMPO (0  $\mu$ M) group, (A) P=0.0462. (B) P= 0.0325. (C) P= 0.4509. (D) P= 0.0107. (E) P= 0.0475. The mean and SD summary data for quantification of Western blots are shown in Table S3. The actual P-values for non-statistically and statistically significant results have shown in Table S4.

**Figure S9. Quantification of western blot analysis of ATG5 knockdown cells treated with PS-MPs for expression of ATG5, LC3 and COX-1.** Inflammation-related proteins were evaluated after PS-MPs treatment at concentrations of 0.4 and 0.8 mg/ml for 48 h in ATG5<sup>KD</sup> HK-2 cells. The Western blotting results were graphed and statistically analyzed. (A) ATG5/GAPDH ratio, N=3 (B) LC3-II/LC3-I ratio, N=3 (C) COX-1/GAPDH ratio, N=2. Data are presented as the mean  $\pm$  SD. \*P < 0.05, \*\*P < 0.01, and \*\*\*P < 0.001 compared with control group as determined by two-way ANOVA with Dunnett's multiple comparison test. The mean and SD summary data for quantification of Western blots are shown in Table S3. The actual P-values for non-statistically and statistically significant results have shown in Table S4.

**Figure S10. The effects of PS-MPs on mouse muscle and grip strength.** Six-week-old C57BL/6 male mice without and with 0.2 mg/day and 0.4 mg/day PS-MPs 2 times per week were examined, and the leg muscles of mice were harvested at 8 weeks. (A) Hematoxylin and eosin (H&E) staining, Masson's trichrome staining (MTS), and IHC staining of dystrophin in the muscular sections from mice with or without oral gavage of PS-MPs. Hematoxylin-stained cell nuclei were blue and eosin-stained the extracellular matrix and cytoplasm were pink. MTS-stained collagen fiber was blue and muscle fiber was red. Muscle fiber and IHC staining of dystrophin were quantified and presented % area. The mean and SD summary data for quantification are shown in Table S5. (B) Handgrip strength in a single-blind test of mice with oral gavage of 0.4 mg/day PS-MPs for 8 weeks before the mice were sacrificed. Data are presented as the mean  $\pm$  SD. N=7, \*\*\*P < 0.001 compared with sham group of mice as determined by t test (Sham group vs PS-MPs group: P<0.001). The mean and SD summary data for handgrip strength are shown in Table S3. Scale bar=60  $\mu$ m.

**Figure S11. Protein expression in mouse urine after treatment with PS-MPs.** (A) Sodium dodecyl sulfate–polyacrylamide gel electrophoresis (SDS-PAGE) of urine from the mice was collected after oral gavage of 0.4 mg/day PS-MPs for 4 weeks. The red frame shows the difference between the groups treated with oral gavage of 0.4 mg/day PS-MPs or the sham group. Bovine serum albumin (BSA) is a serum albumin protein derived from cows. N=3. (B) Immunoblotting of urine samples from 3 different mice with albumin at 8 weeks. (C) The Western blotting results were graphed and statistically analyzed. N=3. Data are presented as the mean  $\pm$  SD. \*\*\*P < 0.001 compared with sham group as determined by t test. P < 0.001. The mean and SD summary data for quantification of Western blots are shown in Table S3.

## Supplemental material

**Table S1. Physical characteristics of PS-MPs.**

| Characterization           | Mean  | SD   |
|----------------------------|-------|------|
| Hydrodynamic diameter (nm) | 1878  | 67.7 |
| Zeta potential (mV)        | -76   | 1.2  |
| PDI <sup>a</sup>           | 0.189 | -    |

PDI<sup>a</sup> is the polydispersity index

**Table S2. The estimated concentrations of PS-MPs in each kidney.**

| Sample         | Raman intensity<br>(count) | Estimated concentration<br>(mg/g <sub>[kidney]</sub> ) |
|----------------|----------------------------|--------------------------------------------------------|
| Sham group-1   | 288                        | 0.47                                                   |
| Sham group-2   | 290                        | 0.48                                                   |
| Sham group-3   | 317                        | 0.71                                                   |
| Sham group-4   | 319                        | 0.73                                                   |
| Sham group-5   | 323                        | 0.76                                                   |
| PS-MPs group-1 | 582                        | 2.94                                                   |
| PS-MPs group-2 | 588                        | 2.99                                                   |
| PS-MPs group-3 | 594                        | 3.04                                                   |
| PS-MPs group-4 | 596                        | 3.06                                                   |
| PS-MPs group-5 | 627                        | 3.32                                                   |

**Table S3. The mean and SD summary data for quantification.**

| Figure 1D  | 1h      |        | 2h     |        |       |        |
|------------|---------|--------|--------|--------|-------|--------|
|            | Mean    | SD     | Mean   | SD     |       |        |
| 0 mg/ml    | 100.00  | 4.74   | 100.00 | 4.35   |       |        |
| 0.05 mg/ml | 122.50  | 16.55  | 131.50 | 6.59   |       |        |
| 0.1 mg/ml  | 141.70  | 20.35  | 152.40 | 7.78   |       |        |
| 0.2 mg/ml  | 161.60  | 25.55  | 202.40 | 19.30  |       |        |
| 0.4 mg/ml  | 206.80  | 35.39  | 274.80 | 43.72  |       |        |
| 0.8 mg/ml  | 271.70  | 60.18  | 355.20 | 64.07  |       |        |
| Figure 2A  | 1 day   |        | 2 day  |        | 3 day |        |
|            | Mean    | SD     | Mean   | SD     | Mean  | SD     |
|            | 0 mg/ml | 100.00 | 0.94   | 100.00 | 3.55  | 100.00 |

|                                             |                       |           |                        |           |        |      |
|---------------------------------------------|-----------------------|-----------|------------------------|-----------|--------|------|
| 0.025 mg/ml                                 | 99.18                 | 1.45      | 99.89                  | 4.05      | 104.13 | 1.93 |
| 0.05 mg/ml                                  | 100.58                | 2.09      | 99.05                  | 4.14      | 101.81 | 1.85 |
| 0.1 mg/ml                                   | 101.45                | 3.71      | 99.27                  | 4.78      | 102.65 | 1.30 |
| 0.2 mg/ml                                   | 102.77                | 3.78      | 101.24                 | 2.47      | 102.76 | 3.87 |
| 0.4 mg/ml                                   | 102.79                | 7.67      | 98.99                  | 2.37      | 104.87 | 2.67 |
| 0.8 mg/ml                                   | 98.87                 | 2.23      | 101.29                 | 4.30      | 108.04 | 0.67 |
| <b>Figure 2C</b>                            |                       |           |                        |           |        |      |
|                                             | <b>Necrosis index</b> |           | <b>Apoptosis index</b> |           |        |      |
|                                             | <b>Mean</b>           | <b>SD</b> | <b>Mean</b>            | <b>SD</b> |        |      |
| 0 mg/ml                                     | 3.71                  | 1.00      | 9.76                   | 1.87      |        |      |
| 0.05 mg/ml                                  | 3.75                  | 0.52      | 8.97                   | 3.96      |        |      |
| 0.1 mg/ml                                   | 4.22                  | 1.09      | 9.30                   | 3.47      |        |      |
| 0.2 mg/ml                                   | 5.38                  | 1.54      | 10.78                  | 4.28      |        |      |
| 0.4 mg/ml                                   | 6.92                  | 0.45      | 9.89                   | 3.62      |        |      |
| 0.8 mg/ml                                   | 8.38                  | 2.07      | 8.94                   | 4.29      |        |      |
| <b>Figure 2E</b>                            |                       |           |                        |           |        |      |
|                                             | <b>Mean</b>           | <b>SD</b> |                        |           |        |      |
| 0 mg/ml                                     | 100.00                | 16.25     |                        |           |        |      |
| 0.05 mg/ml                                  | 122.46                | 21.63     |                        |           |        |      |
| 0.1 mg/ml                                   | 149.52                | 14.20     |                        |           |        |      |
| 0.2 mg/ml                                   | 200.53                | 16.48     |                        |           |        |      |
| 0.4 mg/ml                                   | 333.54                | 62.88     |                        |           |        |      |
| 0.8 mg/ml                                   | 301.13                | 63.93     |                        |           |        |      |
| <b>Figure 3G</b>                            |                       |           |                        |           |        |      |
|                                             | <b>Mean</b>           | <b>SD</b> |                        |           |        |      |
| 0 mg/ml                                     | 2.81                  | 0.77      |                        |           |        |      |
| 0.05 mg/ml                                  | 4.77                  | 1.06      |                        |           |        |      |
| 0.1 mg/ml                                   | 8.33                  | 1.32      |                        |           |        |      |
| 0.2 mg/ml                                   | 11.49                 | 2.57      |                        |           |        |      |
| 0.4 mg/ml                                   | 18.97                 | 3.48      |                        |           |        |      |
| 0.8 mg/ml                                   | 22.62                 | 3.80      |                        |           |        |      |
| <b>Figure 4B</b>                            |                       |           |                        |           |        |      |
|                                             | <b>Mean</b>           | <b>SD</b> |                        |           |        |      |
| PS-MPs 0 mg/ml                              | 100.00                | 3.34      |                        |           |        |      |
| PS-MPs 0.8 mg/ml<br>+ MitoTEMPO (0 $\mu$ M) | 295.50                | 21.51     |                        |           |        |      |

|                                                  |                                            |           |                                            |           |                            |           |
|--------------------------------------------------|--------------------------------------------|-----------|--------------------------------------------|-----------|----------------------------|-----------|
| PS-MPs 0.8 mg/ml<br>+ MitoTEMPO (40 $\mu$ M)     | 262.80                                     | 52.73     |                                            |           |                            |           |
| PS-MPs 0.8 mg/ml<br>+ MitoTEMPO (80 $\mu$ M)     | 239.20                                     | 3.85      |                                            |           |                            |           |
| PS-MPs 0.8 mg/ml<br>+ MitoTEMPO (100<br>$\mu$ M) | 169.40                                     | 9.63      |                                            |           |                            |           |
| <b>Figure 5B</b>                                 | <b>Void</b>                                |           | <b>ATG5<sup>KD</sup>#1</b>                 |           | <b>ATG5<sup>KD</sup>#2</b> |           |
|                                                  | <b>Mean</b>                                | <b>SD</b> | <b>Mean</b>                                | <b>SD</b> | <b>Mean</b>                | <b>SD</b> |
| 0 mg/ml                                          | 100.00                                     | 4.73      | 100.00                                     | 9.15      | 100.00                     | 5.12      |
| 0.4 mg/ml                                        | 102.41                                     | 2.95      | 79.87                                      | 3.68      | 66.85                      | 16.71     |
| 0.8 mg/ml                                        | 95.64                                      | 4.57      | 75.68                                      | 2.24      | 66.66                      | 13.61     |
| <b>Figure 5D</b>                                 | <b><i>Atg5</i><sup>+/+</sup> MEF cells</b> |           | <b><i>Atg5</i><sup>-/-</sup> MEF cells</b> |           |                            |           |
|                                                  | <b>Mean</b>                                | <b>SD</b> | <b>Mean</b>                                | <b>SD</b> |                            |           |
| 0 mg/ml                                          | 100.00                                     | 3.30      | 100.00                                     | 4.57      |                            |           |
| 0.4 mg/ml                                        | 97.80                                      | 7.76      | 84.50                                      | 4.97      |                            |           |
| 0.8 mg/ml                                        | 90.80                                      | 1.97      | 65.60                                      | 7.40      |                            |           |
| <b>Figure 5F</b>                                 | <b><i>Atg5</i><sup>+/+</sup> MEF cells</b> |           | <b><i>Atg5</i><sup>-/-</sup> MEF cells</b> |           |                            |           |
| <b>Necrosis index</b>                            | <b>Mean</b>                                | <b>SD</b> | <b>Mean</b>                                | <b>SD</b> |                            |           |
| 0 mg/ml                                          | 3.29                                       | 0.67      | 2.03                                       | 1.05      |                            |           |
| 0.4 mg/ml                                        | 6.02                                       | 1.97      | 3.68                                       | 1.60      |                            |           |
| 0.8 mg/ml                                        | 6.20                                       | 2.54      | 4.43                                       | 2.12      |                            |           |
| <b>Apoptosis index</b>                           | <b><i>Atg5</i><sup>+/+</sup> MEF cells</b> |           | <b><i>Atg5</i><sup>-/-</sup> MEF cells</b> |           |                            |           |
|                                                  | <b>Mean</b>                                | <b>SD</b> | <b>Mean</b>                                | <b>SD</b> |                            |           |
| 0 mg/ml                                          | 12.70                                      | 4.69      | 9.34                                       | 3.18      |                            |           |
| 0.4 mg/ml                                        | 19.78                                      | 2.45      | 27.60                                      | 2.39      |                            |           |
| 0.8 mg/ml                                        | 25.16                                      | 1.81      | 36.96                                      | 4.50      |                            |           |
| <b>Figure 6A</b>                                 | <b>sham group</b>                          |           | <b>0.2 mg/day group</b>                    |           | <b>0.4 mg/day group</b>    |           |
| <b>4 weeks group</b>                             | <b>Mean</b>                                | <b>SD</b> | <b>Mean</b>                                | <b>SD</b> | <b>Mean</b>                | <b>SD</b> |
| 0 week                                           | 23.17                                      | 1.54      | 23.36                                      | 1.32      | 23.36                      | 1.32      |
| 1 week                                           | 24.64                                      | 2.17      | 24.75                                      | 1.92      | 24.89                      | 1.15      |
| 2 weeks                                          | 25.39                                      | 2.40      | 25.64                                      | 1.93      | 25.82                      | 1.22      |

|                      |                   |           |                         |           |                         |           |
|----------------------|-------------------|-----------|-------------------------|-----------|-------------------------|-----------|
| 3 weeks              | 26.44             | 2.35      | 26.36                   | 1.85      | 26.50                   | 1.23      |
| 4 weeks              | 26.81             | 2.39      | 26.94                   | 1.82      | 26.44                   | 1.15      |
|                      | <b>sham group</b> |           | <b>0.2 mg/day group</b> |           | <b>0.4 mg/day group</b> |           |
| <b>8 weeks group</b> | <b>Mean</b>       | <b>SD</b> | <b>Mean</b>             | <b>SD</b> | <b>Mean</b>             | <b>SD</b> |
| 0 week               | 23.19             | 0.62      | 23.29                   | 1.32      | 23.34                   | 1.42      |
| 1 week               | 24.16             | 0.29      | 24.43                   | 1.78      | 24.21                   | 1.92      |
| 2 weeks              | 24.94             | 0.46      | 25.21                   | 1.74      | 25.18                   | 1.80      |
| 3 weeks              | 26.00             | 0.65      | 25.86                   | 1.46      | 25.91                   | 1.70      |
| 4 weeks              | 26.06             | 1.02      | 26.31                   | 1.53      | 26.19                   | 1.67      |
| 5 weeks              | 26.69             | 0.84      | 26.50                   | 1.31      | 26.69                   | 1.94      |
| 6 weeks              | 27.13             | 0.95      | 27.00                   | 1.65      | 27.81                   | 2.09      |
| 7 weeks              | 27.38             | 0.74      | 27.06                   | 1.59      | 27.81                   | 2.07      |
| 8 weeks              | 27.75             | 1.10      | 27.81                   | 1.73      | 28.38                   | 1.94      |
| <b>Figure 6B</b>     |                   |           |                         |           |                         |           |
|                      | <b>4 weeks</b>    |           | <b>8 weeks</b>          |           |                         |           |
| <b>BUN</b>           | <b>Mean</b>       | <b>SD</b> | <b>Mean</b>             | <b>SD</b> |                         |           |
| sham group           | 30.50             | 1.80      | 34.00                   | 3.10      |                         |           |
| 0.2 mg/day group     | 28.70             | 2.10      | 33.40                   | 1.80      |                         |           |
| 0.4 mg/day group     | 27.90             | 1.50      | 31.50                   | 3.00      |                         |           |
| <b>Figure 6D</b>     |                   |           |                         |           |                         |           |
|                      | <b>4 weeks</b>    |           | <b>8 weeks</b>          |           |                         |           |
| <b>CREA</b>          | <b>Mean</b>       | <b>SD</b> | <b>Mean</b>             | <b>SD</b> |                         |           |
| sham group           | 0.240             | 0.021     | 0.458                   | 0.008     |                         |           |
| 0.2 mg/day group     | 0.198             | 0.011     | 0.424                   | 0.017     |                         |           |
| 0.4 mg/day group     | 0.202             | 0.011     | 0.386                   | 0.022     |                         |           |
| <b>Figure 7D</b>     |                   |           |                         |           |                         |           |
|                      | <b>Mean</b>       | <b>SD</b> |                         |           |                         |           |
| sham group           | 0.63              | 0.14      |                         |           |                         |           |
| PS-MPs group         | 3.07              | 0.15      |                         |           |                         |           |
| <b>Figure S2</b>     |                   |           |                         |           |                         |           |
|                      | <b>0 min</b>      |           | <b>5 min</b>            |           | <b>10 min</b>           |           |
|                      | <b>Mean</b>       | <b>SD</b> | <b>Mean</b>             | <b>SD</b> | <b>Mean</b>             | <b>SD</b> |



|                                           |                        |           |                         |           |                        |           |
|-------------------------------------------|------------------------|-----------|-------------------------|-----------|------------------------|-----------|
| (A) Bad/GAPDH ratio                       | 1.0                    | 0.00      | 1.35                    | 0.23      | 1.40                   | 0.10      |
| (B) Bcl2/GAPDH ratio                      | 1.0                    | 0.00      | 1.16                    | 0.10      | 1.00                   | 0.08      |
| (C) Bax/GAPDH ratio                       | 1.0                    | 0.00      | 1.03                    | 0.05      | 1.01                   | 0.08      |
|                                           | <b>20 min</b>          |           | <b>30 min</b>           |           | <b>60 min</b>          |           |
|                                           | <b>Mean</b>            | <b>SD</b> | <b>Mean</b>             | <b>SD</b> | <b>Mean</b>            | <b>SD</b> |
| (A) Bad/GAPDH ratio                       | 1.55                   | 0.10      | 1.60                    | 0.14      | 1.40                   | 0.17      |
| (B) Bcl2/GAPDH ratio                      | 0.58                   | 0.10      | 0.69                    | 0.20      | 0.72                   | 0.04      |
| (C) Bax/GAPDH ratio                       | 1.04                   | 0.05      | 1.05                    | 0.06      | 1.09                   | 0.11      |
| <b>Figure S3</b>                          |                        |           |                         |           |                        |           |
|                                           | <b>0 mg/ml group</b>   |           | <b>0.05 mg/ml group</b> |           | <b>0.1 mg/ml group</b> |           |
|                                           | <b>Mean</b>            | <b>SD</b> | <b>Mean</b>             | <b>SD</b> | <b>Mean</b>            | <b>SD</b> |
| (A) IRE1 $\alpha$ /GAPDH ratio            | 1.00                   | 0.00      | 1.20                    | 0.09      | 1.36                   | 0.26      |
| (B) ATF6/GAPDH ratio                      | 1.00                   | 0.00      | 1.09                    | 0.19      | 1.02                   | 0.06      |
| (C) p-EIF2 $\alpha$ / EIF2 $\alpha$ ratio | 1.00                   | 0.00      | 1.27                    | 0.32      | 1.13                   | 0.31      |
|                                           | <b>0.2 mg/ml group</b> |           | <b>0.4 mg/ml group</b>  |           | <b>0.8 mg/ml group</b> |           |
|                                           | <b>Mean</b>            | <b>SD</b> | <b>Mean</b>             | <b>SD</b> | <b>Mean</b>            | <b>SD</b> |
| (A) IRE1 $\alpha$ /GAPDH ratio            | 1.51                   | 0.35      | 1.56                    | 0.23      | 1.57                   | 0.18      |
| (B) ATF6/GAPDH ratio                      | 0.95                   | 0.09      | 0.99                    | 0.14      | 0.95                   | 0.16      |
| (C) p-EIF2 $\alpha$ / EIF2 $\alpha$ ratio | 1.27                   | 0.25      | 1.30                    | 0.40      | 1.47                   | 0.21      |
| <b>Figure S4</b>                          |                        |           |                         |           |                        |           |
|                                           | <b>0 min</b>           |           | <b>5 min</b>            |           | <b>10 min</b>          |           |
|                                           | <b>Mean</b>            | <b>SD</b> | <b>Mean</b>             | <b>SD</b> | <b>Mean</b>            | <b>SD</b> |
| (A) p-ERK1/2/ERK1/2 ratio                 | 1.00                   | 0.00      | 1.20                    | 0.06      | 1.40                   | 0.14      |
| (B) p-JNK/JNK ratio                       | 1.00                   | 0.00      | 1.33                    | 0.12      | 1.39                   | 0.09      |
| (C) p-p38/ p-p38 ratio                    | 1.00                   | 0.00      | 1.49                    | 0.23      | 1.61                   | 0.11      |
|                                           | <b>20 min</b>          |           | <b>30 min</b>           |           | <b>60 min</b>          |           |
|                                           | <b>Mean</b>            | <b>SD</b> | <b>Mean</b>             | <b>SD</b> | <b>Mean</b>            | <b>SD</b> |
| (A) p-ERK1/2/ERK1/2 ratio                 | 1.53                   | 0.18      | 1.21                    | 0.13      | 1.34                   | 0.13      |
| (B) p-JNK/JNK ratio                       | 1.54                   | 0.33      | 1.70                    | 0.29      | 1.07                   | 0.06      |
| (C) p-p38/ p-p38 ratio                    | 1.51                   | 0.03      | 1.48                    | 0.04      | 0.88                   | 0.33      |
| <b>Figure S5</b>                          |                        |           |                         |           |                        |           |
|                                           | <b>0 mg/ml group</b>   |           | <b>0.05 mg/ml group</b> |           | <b>0.1 mg/ml group</b> |           |
|                                           | <b>Mean</b>            | <b>SD</b> | <b>Mean</b>             | <b>SD</b> | <b>Mean</b>            | <b>SD</b> |
| (A) cPLA2/GAPDH ratio                     | 1.00                   | 0.00      | 0.79                    | 0.14      | 0.80                   | 0.17      |
| (B) COX-1/GAPDH ratio                     | 1.00                   | 0.00      | 1.07                    | 0.08      | 1.21                   | 0.07      |
|                                           | <b>0.2 mg/ml group</b> |           | <b>0.4 mg/ml group</b>  |           | <b>0.8 mg/ml group</b> |           |
|                                           | <b>Mean</b>            | <b>SD</b> | <b>Mean</b>             | <b>SD</b> | <b>Mean</b>            | <b>SD</b> |

|                                |                         |           |                                                                             |           |                        |           |
|--------------------------------|-------------------------|-----------|-----------------------------------------------------------------------------|-----------|------------------------|-----------|
| (A) cPLA2/GAPDH ratio          | 0.84                    | 0.21      | 1.11                                                                        | 0.22      | 1.47                   | 0.14      |
| (B) COX-1/GAPDH ratio          | 1.15                    | 0.13      | 1.28                                                                        | 0.15      | 1.29                   | 0.14      |
| <b>Figure S6</b>               |                         |           |                                                                             |           |                        |           |
|                                | <b>0 mg/ml group</b>    |           | <b>0.05 mg/ml group</b>                                                     |           | <b>0.1 mg/ml group</b> |           |
|                                | <b>Mean</b>             | <b>SD</b> | <b>Mean</b>                                                                 | <b>SD</b> | <b>Mean</b>            | <b>SD</b> |
| (A) p-mTOR/mTOR ratio          | 1.00                    | 0.00      | 0.86                                                                        | 0.03      | 0.88                   | 0.02      |
| (B) p-AKT/AKT ratio            | 1.00                    | 0.00      | 0.93                                                                        | 0.19      | 0.77                   | 0.16      |
|                                | <b>0.2 mg/ml group</b>  |           | <b>0.4 mg/ml group</b>                                                      |           | <b>0.8 mg/ml group</b> |           |
|                                | <b>Mean</b>             | <b>SD</b> | <b>Mean</b>                                                                 | <b>SD</b> | <b>Mean</b>            | <b>SD</b> |
| (A) p-mTOR/mTOR ratio          | 0.66                    | 0.08      | 0.68                                                                        | 0.19      | 0.59                   | 0.10      |
| (B) p-AKT/AKT ratio            | 0.74                    | 0.10      | 0.70                                                                        | 0.10      | 0.59                   | 0.09      |
| <b>Figure S7</b>               |                         |           |                                                                             |           |                        |           |
|                                | <b>0 mg/ml group</b>    |           | <b>0.05 mg/ml group</b>                                                     |           | <b>0.1 mg/ml group</b> |           |
|                                | <b>Mean</b>             | <b>SD</b> | <b>Mean</b>                                                                 | <b>SD</b> | <b>Mean</b>            | <b>SD</b> |
| (A) p62/GAPDH ratio            | 1.00                    | 0.00      | 1.05                                                                        | 0.11      | 1.07                   | 0.11      |
| (B) Beclin 1/GAPDH ratio       | 1.00                    | 0.00      | 1.12                                                                        | 0.13      | 1.21                   | 0.03      |
| (C) LC3-II/LC3-I ratio         | 1.00                    | 0.00      | 1.27                                                                        | 0.18      | 1.62                   | 0.26      |
|                                | <b>0.2 mg/ml group</b>  |           | <b>0.4 mg/ml group</b>                                                      |           | <b>0.8 mg/ml group</b> |           |
|                                | <b>Mean</b>             | <b>SD</b> | <b>Mean</b>                                                                 | <b>SD</b> | <b>Mean</b>            | <b>SD</b> |
| (A) p62/GAPDH ratio            | 1.09                    | 0.26      | 1.15                                                                        | 0.09      | 1.40                   | 0.26      |
| (B) Beclin 1/GAPDH ratio       | 1.21                    | 0.11      | 1.12                                                                        | 0.03      | 1.02                   | 0.11      |
| (C) LC3-II/LC3-I ratio         | 2.21                    | 0.52      | 4.69                                                                        | 1.99      | 6.55                   | 1.87      |
| <b>Figure S8</b>               |                         |           |                                                                             |           |                        |           |
|                                | <b>PS-MPs 0 mg/ml</b>   |           | <b>MitoTEMPO<br/>(0 <math>\mu</math>M)</b>                                  |           |                        |           |
|                                | <b>Mean</b>             | <b>SD</b> | <b>Mean</b>                                                                 | <b>SD</b> |                        |           |
| (A) Bad/GAPDH ratio            | 1.00                    | 0.00      | 1.18                                                                        | 0.12      |                        |           |
| (B) IRE1 $\alpha$ /GAPDH ratio | 1.00                    | 0.00      | 1.29                                                                        | 0.07      |                        |           |
| (C) p-ERK1/2/ERK1/2 ratio      | 1.00                    | 0.00      | 1.03                                                                        | 0.01      |                        |           |
| (D) p-mTOR/mTOR ratio          | 1.00                    | 0.00      | 1.03                                                                        | 0.02      |                        |           |
| (E) LC3-II/LC3-I ratio         | 1.00                    | 0.00      | 0.74                                                                        | 0.54      |                        |           |
|                                | <b>PS-MPs 0.8 mg/ml</b> |           | <b>PS-MPs 0.8<br/>mg/ml<br/>+<br/>MitoTEMPO<br/>(100 <math>\mu</math>M)</b> |           |                        |           |
|                                | <b>Mean</b>             | <b>SD</b> | <b>Mean</b>                                                                 | <b>SD</b> |                        |           |

|                                |                      |           |                        |           |                        |           |
|--------------------------------|----------------------|-----------|------------------------|-----------|------------------------|-----------|
| (A) Bad/GAPDH ratio            | 1.46                 | 0.26      | 0.91                   | 0.21      |                        |           |
| (B) IRE1 $\alpha$ /GAPDH ratio | 1.40                 | 0.12      | 1.11                   | 0.08      |                        |           |
| (C) p-ERK1/2/ERK1/2 ratio      | 5.21                 | 5.23      | 4.11                   | 3.90      |                        |           |
| (D) p-mTOR/mTOR ratio          | 0.75                 | 0.03      | 1.26                   | 0.07      |                        |           |
| (E) LC3-II/LC3-I ratio         | 14.55                | 6.60      | 9.87                   | 6.10      |                        |           |
| <b>Figure S9</b>               |                      |           |                        |           |                        |           |
|                                | <b>0 mg/ml group</b> |           | <b>0.4 mg/ml group</b> |           | <b>0.8 mg/ml group</b> |           |
| (A) ATG5/GAPDH ratio           | <b>Mean</b>          | <b>SD</b> | <b>Mean</b>            | <b>SD</b> | <b>Mean</b>            | <b>SD</b> |
| Void                           | 1.00                 | 0.00      | 1.07                   | 0.17      | 1.01                   | 0.33      |
| ATG5 <sup>KD</sup> #1          | 0.55                 | 0.17      | 0.44                   | 0.20      | 0.32                   | 0.08      |
| ATG5 <sup>KD</sup> #2          | 0.47                 | 0.08      | 0.42                   | 0.07      | 0.34                   | 0.05      |
| (B) LC3-II/LC3-I ratio         | <b>0 mg/ml group</b> |           | <b>0.4 mg/ml group</b> |           | <b>0.8 mg/ml group</b> |           |
|                                | <b>Mean</b>          | <b>SD</b> | <b>Mean</b>            | <b>SD</b> | <b>Mean</b>            | <b>SD</b> |
| Void                           | 1.00                 | 0.00      | 5.38                   | 0.97      | 8.42                   | 4.15      |
| ATG5 <sup>KD</sup> #1          | 0.71                 | 0.54      | 3.34                   | 1.59      | 3.98                   | 1.20      |
| ATG5 <sup>KD</sup> #2          | 0.45                 | 0.46      | 3.06                   | 0.70      | 4.68                   | 1.25      |
| (C) COX-1/GAPDH ratio          | <b>0 mg/ml group</b> |           | <b>0.4 mg/ml group</b> |           | <b>0.8 mg/ml group</b> |           |
|                                | <b>Mean</b>          | <b>SD</b> | <b>Mean</b>            | <b>SD</b> | <b>Mean</b>            | <b>SD</b> |
| Void                           | 1.00                 | 0.00      | 1.03                   | 0.24      | 1.15                   | 0.17      |
| ATG5 <sup>KD</sup> #1          | 1.15                 | 0.03      | 1.27                   | 0.18      | 1.47                   | 0.15      |
| ATG5 <sup>KD</sup> #2          | 0.92                 | 0.18      | 1.28                   | 0.25      | 1.28                   | 0.05      |
| <b>Figure S10B</b>             |                      |           |                        |           |                        |           |
|                                | <b>Mean</b>          | <b>SD</b> |                        |           |                        |           |
| Sham group                     | 0.128389             | 0.0071273 |                        |           |                        |           |
| PS-MPs group                   | 0.111361             | 0.006699  |                        |           |                        |           |
| <b>Figure S11C</b>             |                      |           |                        |           |                        |           |
|                                | <b>Mean</b>          | <b>SD</b> |                        |           |                        |           |
| Sham group                     | 1.00                 | 0.00      |                        |           |                        |           |
| PS-MPs group                   | 1.37                 | 0.07      |                        |           |                        |           |

**Table S4. P-values for non-statistically and statistically significant results.**

| <b>Figure 1D</b>                  |                |                |
|-----------------------------------|----------------|----------------|
| Sidak's multiple comparisons test | <b>P Value</b> | <b>Summary</b> |
| 1h                                |                |                |
| 0 mg/ml group vs 0.05 mg/ml group | 0.9262         | ns             |
| 0 mg/ml group vs 0.1 mg/ml group  | 0.5023         | ns             |

|                                     |                |                |
|-------------------------------------|----------------|----------------|
| 0 mg/ml group vs 0.2 mg/ml group    | 0.1391         | ns             |
| 0 mg/ml group vs 0.4 mg/ml group    | 0.0025         | **             |
| 0 mg/ml group vs 0.8 mg/ml group    | <0.001         | ***            |
|                                     |                |                |
| 2h                                  |                |                |
| 0 mg/ml group vs 0.05 mg/ml group   | 0.7598         | ns             |
| 0 mg/ml group vs 0.1 mg/ml group    | 0.2685         | ns             |
| 0 mg/ml group vs 0.2 mg/ml group    | 0.0039         | **             |
| 0 mg/ml group vs 0.4 mg/ml group    | <0.001         | ***            |
| 0 mg/ml group vs 0.8 mg/ml group    | <0.001         | ***            |
|                                     |                |                |
|                                     |                |                |
| <b>Figure 2A</b>                    |                |                |
| Dunnett's multiple comparisons test | <b>P Value</b> | <b>Summary</b> |
|                                     |                |                |
| 1 day                               |                |                |
| 0 mg/ml group vs 0.05 mg/ml group   | 0.9996         | ns             |
| 0 mg/ml group vs 0.1 mg/ml group    | 0.9997         | ns             |
| 0 mg/ml group vs 0.2 mg/ml group    | 0.9878         | ns             |
| 0 mg/ml group vs 0.4 mg/ml group    | 0.8045         | ns             |
| 0 mg/ml group vs 0.8 mg/ml group    | 0.7999         | ns             |
| 0 mg/ml group vs 0.05 mg/ml group   | 0.9960         | ns             |
|                                     |                |                |
| 2 day                               |                |                |
| 0 mg/ml group vs 0.05 mg/ml group   | >0.9999        | ns             |
| 0 mg/ml group vs 0.1 mg/ml group    | 0.9980         | ns             |
| 0 mg/ml group vs 0.2 mg/ml group    | 0.9996         | ns             |
| 0 mg/ml group vs 0.4 mg/ml group    | 0.9943         | ns             |
| 0 mg/ml group vs 0.8 mg/ml group    | 0.9978         | ns             |
| 0 mg/ml group vs 0.05 mg/ml group   | 0.9932         | ns             |
|                                     |                |                |
| 3 day                               |                |                |
| 0 mg/ml group vs 0.05 mg/ml group   | 0.4578         | ns             |
| 0 mg/ml group vs 0.1 mg/ml group    | 0.9635         | ns             |
| 0 mg/ml group vs 0.2 mg/ml group    | 0.8315         | ns             |
| 0 mg/ml group vs 0.4 mg/ml group    | 0.8083         | ns             |
| 0 mg/ml group vs 0.8 mg/ml group    | 0.2989         | ns             |
| 0 mg/ml group vs 0.05 mg/ml group   | 0.0241         | *              |
|                                     |                |                |

| <b>Figure 2C</b>                       |                |                |
|----------------------------------------|----------------|----------------|
| Dunnett's multiple comparisons test    | <b>P Value</b> | <b>Summary</b> |
| <b>Necrosis index</b>                  |                |                |
| 0 mg/ml group vs 0.05 mg/ml group      | >0.9999        | ns             |
| 0 mg/ml group vs 0.1 mg/ml group       | 0.9796         | ns             |
| 0 mg/ml group vs 0.2 mg/ml group       | 0.3830         | ns             |
| 0 mg/ml group vs 0.4 mg/ml group       | 0.0319         | *              |
| 0 mg/ml group vs 0.8 mg/ml group       | 0.0026         | **             |
| <b>Apoptosis index</b>                 |                |                |
| 0 mg/ml group vs 0.05 mg/ml group      | 0.9986         | ns             |
| 0 mg/ml group vs 0.1 mg/ml group       | 0.9998         | ns             |
| 0 mg/ml group vs 0.2 mg/ml group       | 0.9962         | ns             |
| 0 mg/ml group vs 0.4 mg/ml group       | >0.9999        | ns             |
| 0 mg/ml group vs 0.8 mg/ml group       | 0.9985         | ns             |
| <b>Figure 2E</b>                       |                |                |
| Dunnett's multiple comparisons test    | <b>P Value</b> | <b>Summary</b> |
| 0 mg/ml group vs 0.05 mg/ml group      | 0.9269         | ns             |
| 0 mg/ml group vs 0.1 mg/ml group       | 0.4328         | ns             |
| 0 mg/ml group vs 0.2 mg/ml group       | 0.0331         | *              |
| 0 mg/ml group vs 0.4 mg/ml group       | <0.001         | ***            |
| 0 mg/ml group vs 0.8 mg/ml group       | <0.001         | ***            |
| <b>Figure 3G</b>                       |                |                |
| Dunnett's multiple comparisons test    | <b>P Value</b> | <b>Summary</b> |
| 0 mg/ml group vs 0.05 mg/ml group      | 0.7149         | ns             |
| 0 mg/ml group vs 0.1 mg/ml group       | 0.0265         | *              |
| 0 mg/ml group vs 0.2 mg/ml group       | <0.001         | ***            |
| 0 mg/ml group vs 0.4 mg/ml group       | <0.001         | ***            |
| 0 mg/ml group vs 0.8 mg/ml group       | <0.001         | ***            |
| <b>Figure 4B</b>                       |                |                |
| Dunnett's multiple comparisons test    | <b>P Value</b> | <b>Summary</b> |
| PS-MPs 0.8 mg/ml group vs MitoTEMPO (0 | 0.0019         | **             |

|                                                                              |                |                |
|------------------------------------------------------------------------------|----------------|----------------|
| μM) group                                                                    |                |                |
| PS-MPs 0.8 mg/ml group vs PS-MPs 0.8 mg/ml group + MitoTEMPO (40 μM) group   | 0.5755         | ns             |
| PS-MPs 0.8 mg/ml group vs PS-MPs 0.8 mg/ml group + MitoTEMPO (80 μM) group   | 0.2123         | ns             |
| PS-MPs 0.8 mg/ml group vs PS-MPs 0.8 mg/ml group + MitoTEMPO (100 μM) group  | 0.0135         | *              |
|                                                                              |                |                |
| <b>Figure 5B</b>                                                             |                |                |
| Dunnett's multiple comparisons test                                          | <b>P Value</b> | <b>Summary</b> |
|                                                                              |                |                |
| Control                                                                      |                |                |
| 0 mg/ml group vs 0.4 mg/ml group                                             | 0.9156         | ns             |
| 0 mg/ml group vs 0.8 mg/ml group                                             | 0.7564         | ns             |
|                                                                              |                |                |
| ATG5 <sup>KD</sup> #1                                                        |                |                |
| 0 mg/ml group vs 0.4 mg/ml group                                             | 0.0174         | *              |
| 0 mg/ml group vs 0.8 mg/ml group                                             | 0.0047         | **             |
|                                                                              |                |                |
| ATG5 <sup>KD</sup> #2                                                        |                |                |
| 0 mg/ml group vs 0.4 mg/ml group                                             | <0.001         | ***            |
| 0 mg/ml group vs 0.8 mg/ml group                                             | <0.001         | ***            |
|                                                                              |                |                |
| <b>Figure 5D</b>                                                             |                |                |
| Sidak's multiple comparisons test                                            | <b>P Value</b> | <b>Summary</b> |
|                                                                              |                |                |
| <i>Atg5</i> <sup>+/+</sup> MEF cells vs <i>Atg5</i> <sup>-/-</sup> MEF cells |                |                |
| 0 mg/ml                                                                      | >0.9999        | ns             |
| 0.4 mg/ml                                                                    | 0.0321         | *              |
| 0.8 mg/ml                                                                    | <0.001         | ***            |
|                                                                              |                |                |
| <b>Figure 5F</b>                                                             |                |                |
| Sidak's multiple comparisons test                                            | <b>P Value</b> | <b>Summary</b> |
|                                                                              |                |                |
| <i>Atg5</i> <sup>+/+</sup> MEF cells vs <i>Atg5</i> <sup>-/-</sup> MEF cells |                |                |
| <b>Necrosis index</b>                                                        |                |                |
|                                                                              |                |                |
| 0 mg/ml                                                                      | 0.7873         | ns             |
| 0.4 mg/ml                                                                    | 0.3460         | ns             |
| 0.8 mg/ml                                                                    | 0.5692         | ns             |

|                                     |                |                |
|-------------------------------------|----------------|----------------|
|                                     |                |                |
| <b>Apoptosis index</b>              |                |                |
|                                     |                |                |
| 0 mg/ml                             | 0.5657         | ns             |
| 0.4 mg/ml                           | 0.0426         | *              |
| 0.8 mg/ml                           | 0.0030         | **             |
|                                     |                |                |
| <b>Figure 6A</b>                    |                |                |
| 4 weeks                             |                |                |
| Dunnett's multiple comparisons test | <b>P Value</b> | <b>Summary</b> |
|                                     |                |                |
| 0 week                              |                |                |
| sham group vs 0.2 mg/day group      | 0.9678         | ns             |
| sham group vs 0.4 mg/day group      | 0.9678         | ns             |
|                                     |                |                |
| 1 week                              |                |                |
| sham group vs 0.2 mg/day group      | 0.9896         | ns             |
| sham group vs 0.4 mg/day group      | 0.9464         | ns             |
|                                     |                |                |
| 2 weeks                             |                |                |
| sham group vs 0.2 mg/day group      | 0.9426         | ns             |
| sham group vs 0.4 mg/day group      | 0.8434         | ns             |
|                                     |                |                |
| 3 weeks                             |                |                |
| sham group vs 0.2 mg/day group      | 0.9939         | ns             |
| sham group vs 0.4 mg/day group      | 0.9964         | ns             |
|                                     |                |                |
| 4 weeks                             |                |                |
| sham group vs 0.2 mg/day group      | 0.9855         | ns             |
| sham group vs 0.4 mg/day group      | 0.8787         | ns             |
|                                     |                |                |
| <b>Figure 6A</b>                    |                |                |
| 8 weeks                             |                |                |
| Dunnett's multiple comparisons test | <b>P Value</b> | <b>Summary</b> |
|                                     |                |                |
| 0 week                              |                |                |
| sham group vs 0.2 mg/day group      | 0.9866         | ns             |
| sham group vs 0.4 mg/day group      | 0.9725         | ns             |
|                                     |                |                |
| 1 week                              |                |                |

|                                   |                |                |
|-----------------------------------|----------------|----------------|
| sham group vs 0.2 mg/day group    | 0.9079         | ns             |
| sham group vs 0.4 mg/day group    | 0.9974         | ns             |
|                                   |                |                |
| 2 weeks                           |                |                |
| sham group vs 0.2 mg/day group    | 0.9038         | ns             |
| sham group vs 0.4 mg/day group    | 0.9234         | ns             |
|                                   |                |                |
| 3 weeks                           |                |                |
| sham group vs 0.2 mg/day group    | 0.9725         | ns             |
| sham group vs 0.4 mg/day group    | 0.9882         | ns             |
|                                   |                |                |
| 4 weeks                           |                |                |
| sham group vs 0.2 mg/day group    | 0.9197         | ns             |
| sham group vs 0.4 mg/day group    | 0.9791         | ns             |
|                                   |                |                |
| 5 weeks                           |                |                |
| sham group vs 0.2 mg/day group    | 0.9538         | ns             |
| sham group vs 0.4 mg/day group    | >0.9999        | ns             |
|                                   |                |                |
| 6 weeks                           |                |                |
| sham group vs 0.2 mg/day group    | 0.9791         | ns             |
| sham group vs 0.4 mg/day group    | 0.5481         | ns             |
|                                   |                |                |
| 7 weeks                           |                |                |
| sham group vs 0.2 mg/day group    | 0.8779         | ns             |
| sham group vs 0.4 mg/day group    | 0.7773         | ns             |
|                                   |                |                |
| 8 weeks                           |                |                |
| sham group vs 0.2 mg/day group    | 0.9947         | ns             |
| sham group vs 0.4 mg/day group    | 0.6056         | ns             |
|                                   |                |                |
| <b>Figure 6B</b>                  |                |                |
| Tukey's multiple comparisons test | <b>P Value</b> | <b>Summary</b> |
|                                   |                |                |
| BUN                               |                |                |
|                                   |                |                |
| 4 weeks                           |                |                |
| sham group vs 0.2 mg/day group    | 0.4435         | ns             |
| sham group vs 0.4 mg/day group    | 0.1952         | ns             |
| 0.2 mg/day vs 0.4 mg/day group    | 0.8475         | ns             |



|                                     |                |                |
|-------------------------------------|----------------|----------------|
|                                     |                |                |
| 8 weeks                             |                |                |
| sham group vs 0.2 mg/day group      | 0.9109         | ns             |
| sham group vs 0.4 mg/day group      | 0.2191         | ns             |
| 0.2 mg/day vs 0.4 mg/day group      | 0.4057         | ns             |
|                                     |                |                |
| CREA                                |                |                |
|                                     |                |                |
| 4 weeks                             |                |                |
| sham group vs 0.2 mg/day group      | 0.001          | ***            |
| sham group vs 0.4 mg/day group      | 0.0026         | **             |
| 0.2 mg/day vs 0.4 mg/day group      | 0.9169         | ns             |
|                                     |                |                |
| 8 weeks                             |                |                |
| sham group vs 0.2 mg/day group      | 0.0068         | **             |
| sham group vs 0.4 mg/day group      | <0.001         | ***            |
| 0.2 mg/day vs 0.4 mg/day group      | 0.0026         | **             |
|                                     |                |                |
| <b>Figure 6D</b>                    |                |                |
| Dunnett's multiple comparisons test | <b>P Value</b> | <b>Summary</b> |
|                                     |                |                |
| 4 weeks                             |                |                |
| sham group vs 0.2 mg/day group      | 0.0342         | *              |
| sham group vs 0.4 mg/day group      | <0.001         | ***            |
|                                     |                |                |
| 8 weeks                             |                |                |
| sham group vs 0.2 mg/day group      | <0.001         | ***            |
| sham group vs 0.4 mg/day group      | <0.001         | ***            |
|                                     |                |                |
| <b>Figure S2</b>                    |                |                |
| (A) Bad/GAPDH ratio                 |                |                |
| Dunnett's multiple comparisons test | <b>P Value</b> | <b>Summary</b> |
| 0 min vs. 5 min                     | 0.0426         | *              |
| 0 min vs. 10 min                    | 0.0187         | *              |
| 0 min vs. 20 min                    | 0.0019         | **             |
| 0 min vs. 30 min                    | 0.001          | ***            |
| 0 min vs. 60 min                    | 0.0177         | *              |
|                                     |                |                |
| (B) Bcl2/GAPDH ratio                |                |                |

| Dunnett's multiple comparisons test       | P Value | Summary |
|-------------------------------------------|---------|---------|
| 0 min vs. 5 min                           | 0.2896  | ns      |
| 0 min vs. 10 min                          | >0.9999 | ns      |
| 0 min vs. 20 min                          | 0.0016  | **      |
| 0 min vs. 30 min                          | 0.014   | *       |
| 0 min vs. 60 min                          | 0.0262  | *       |
|                                           |         |         |
| (C) Bax/GAPDH ratio                       |         |         |
| Dunnett's multiple comparisons test       | P Value | Summary |
| 0 min vs. 5 min                           | 0.9788  | ns      |
| 0 min vs. 10 min                          | 0.9997  | ns      |
| 0 min vs. 20 min                          | 0.9289  | ns      |
| 0 min vs. 30 min                          | 0.8328  | ns      |
| 0 min vs. 60 min                          | 0.3755  | ns      |
|                                           |         |         |
| <b>Figure S3</b>                          |         |         |
| (A) IRE1 $\alpha$ /GAPDH ratio            |         |         |
| Dunnett's multiple comparisons test       | P Value | Summary |
| 0 mg/ml group vs. 0.05 mg/ml group        | 0.6975  | ns      |
| 0 mg/ml group vs. 0.1 mg/ml group         | 0.2046  | ns      |
| 0 mg/ml group vs. 0.2 mg/ml group         | 0.0503  | ns      |
| 0 mg/ml group vs. 0.4 mg/ml group         | 0.0301  | *       |
| 0 mg/ml group vs. 0.8 mg/ml group         | 0.0277  | *       |
|                                           |         |         |
| (B) ATF6/GAPDH ratio                      |         |         |
| Dunnett's multiple comparisons test       | P Value | Summary |
| 0 mg/ml group vs. 0.05 mg/ml group        | 0.8567  | ns      |
| 0 mg/ml group vs. 0.1 mg/ml group         | 0.9997  | ns      |
| 0 mg/ml group vs. 0.2 mg/ml group         | 0.9755  | ns      |
| 0 mg/ml group vs. 0.4 mg/ml group         | >0.9999 | ns      |
| 0 mg/ml group vs. 0.8 mg/ml group         | 0.9755  | ns      |
|                                           |         |         |
| (C) p-EIF2 $\alpha$ / EIF2 $\alpha$ ratio |         |         |
| Dunnett's multiple comparisons test       | P Value | Summary |
| 0 mg/ml group vs. 0.05 mg/ml group        | 0.6628  | ns      |
| 0 mg/ml group vs. 0.1 mg/ml group         | 0.9622  | ns      |
| 0 mg/ml group vs. 0.2 mg/ml group         | 0.6628  | ns      |

|                                     |                |                |
|-------------------------------------|----------------|----------------|
| 0 mg/ml group vs. 0.4 mg/ml group   | 0.5674         | ns             |
| 0 mg/ml group vs. 0.8 mg/ml group   | 0.2066         | ns             |
| <b>Figure S4</b>                    |                |                |
| (A) p-ERK1/2/ERK1/2 ratio           |                |                |
| Dunnett's multiple comparisons test | <b>P Value</b> | <b>Summary</b> |
| 0 min vs. 5 min                     | 0.2169         | ns             |
| 0 min vs. 10 min                    | 0.0063         | **             |
| 0 min vs. 20 min                    | 0.0007         | ***            |
| 0 min vs. 30 min                    | 0.1889         | ns             |
| 0 min vs. 60 min                    | 0.0197         | *              |
| (B) p-JNK/JNK ratio                 |                |                |
| Dunnett's multiple comparisons test | <b>P Value</b> | <b>Summary</b> |
| 0 min vs. 5 min                     | 0.186          | ns             |
| 0 min vs. 10 min                    | 0.097          | ns             |
| 0 min vs. 20 min                    | 0.0186         | *              |
| 0 min vs. 30 min                    | 0.003          | **             |
| 0 min vs. 60 min                    | 0.9833         | ns             |
| (C) p-p38/ p-p38 ratio              |                |                |
| Dunnett's multiple comparisons test | <b>P Value</b> | <b>Summary</b> |
| 0 min vs. 5 min                     | 0.0976         | ns             |
| 0 min vs. 10 min                    | 0.0407         | *              |
| 0 min vs. 20 min                    | 0.0816         | ns             |
| 0 min vs. 30 min                    | 0.1012         | ns             |
| 0 min vs. 60 min                    | 0.9217         | ns             |
| <b>Figure S5</b>                    |                |                |
| (A) cPLA2/GAPDH ratio               |                |                |
| Dunnett's multiple comparisons test | <b>P Value</b> | <b>Summary</b> |
| 0 mg/ml group vs. 0.05 mg/ml group  | 0.427          | ns             |
| 0 mg/ml group vs. 0.1 mg/ml group   | 0.4607         | ns             |
| 0 mg/ml group vs. 0.2 mg/ml group   | 0.6585         | ns             |
| 0 mg/ml group vs. 0.4 mg/ml group   | 0.8875         | ns             |
| 0 mg/ml group vs. 0.8 mg/ml group   | 0.0171         | *              |

|                                     |                |                |
|-------------------------------------|----------------|----------------|
| <b>(B) COX-1/GAPDH ratio</b>        |                |                |
| Dunnett's multiple comparisons test | <b>P Value</b> | <b>Summary</b> |
| 0 mg/ml group vs. 0.05 mg/ml group  | 0.8594         | ns             |
| 0 mg/ml group vs. 0.1 mg/ml group   | 0.1201         | ns             |
| 0 mg/ml group vs. 0.2 mg/ml group   | 0.3394         | ns             |
| 0 mg/ml group vs. 0.4 mg/ml group   | 0.0284         | *              |
| 0 mg/ml group vs. 0.8 mg/ml group   | 0.023          | *              |
| <b>Figure S6</b>                    |                |                |
| <b>(A) p-mTOR/mTOR ratio</b>        |                |                |
| Dunnett's multiple comparisons test | <b>P Value</b> | <b>Summary</b> |
| 0 mg/ml group vs. 0.05 mg/ml group  | 0.4861         | ns             |
| 0 mg/ml group vs. 0.1 mg/ml group   | 0.6201         | ns             |
| 0 mg/ml group vs. 0.2 mg/ml group   | 0.0428         | *              |
| 0 mg/ml group vs. 0.4 mg/ml group   | 0.0553         | ns             |
| 0 mg/ml group vs. 0.8 mg/ml group   | 0.019          | *              |
| <b>(B) p-AKT/AKT ratio</b>          |                |                |
| Dunnett's multiple comparisons test | <b>P Value</b> | <b>Summary</b> |
| 0 mg/ml group vs. 0.05 mg/ml group  | 0.9618         | ns             |
| 0 mg/ml group vs. 0.1 mg/ml group   | 0.3052         | ns             |
| 0 mg/ml group vs. 0.2 mg/ml group   | 0.2308         | ns             |
| 0 mg/ml group vs. 0.4 mg/ml group   | 0.1477         | ns             |
| 0 mg/ml group vs. 0.8 mg/ml group   | 0.0476         | *              |
| <b>Figure S7</b>                    |                |                |
| <b>(A) p62/GAPDH ratio</b>          |                |                |
| Dunnett's multiple comparisons test | <b>P Value</b> | <b>Summary</b> |
| 0 mg/ml group vs. 0.05 mg/ml group  | 0.9946         | ns             |
| 0 mg/ml group vs. 0.1 mg/ml group   | 0.9769         | ns             |
| 0 mg/ml group vs. 0.2 mg/ml group   | 0.9467         | ns             |
| 0 mg/ml group vs. 0.4 mg/ml group   | 0.7221         | ns             |
| 0 mg/ml group vs. 0.8 mg/ml group   | 0.0501         | ns             |
| <b>(B) Beclin 1/GAPDH ratio</b>     |                |                |
| Dunnett's multiple comparisons test | <b>P Value</b> | <b>Summary</b> |
| 0 mg/ml group vs. 0.05 mg/ml group  | 0.3355         | ns             |

|                                     |                |                |
|-------------------------------------|----------------|----------------|
| 0 mg/ml group vs. 0.1 mg/ml group   | 0.0386         | *              |
| 0 mg/ml group vs. 0.2 mg/ml group   | 0.0354         | *              |
| 0 mg/ml group vs. 0.4 mg/ml group   | 0.2911         | ns             |
| 0 mg/ml group vs. 0.8 mg/ml group   | 0.9985         | ns             |
|                                     |                |                |
| (C) LC3-II/LC3-I ratio              |                |                |
| Dunnett's multiple comparisons test | <b>P Value</b> | <b>Summary</b> |
| 0 mg/ml group vs. 0.05 mg/ml group  | 0.9982         | ns             |
| 0 mg/ml group vs. 0.1 mg/ml group   | 0.9383         | ns             |
| 0 mg/ml group vs. 0.2 mg/ml group   | 0.582          | ns             |
| 0 mg/ml group vs. 0.4 mg/ml group   | 0.0077         | **             |
| 0 mg/ml group vs. 0.8 mg/ml group   | <0.001         | ***            |
|                                     |                |                |
| <b>Figure S9</b>                    |                |                |
| (A) ATG5/GAPDH ratio                |                |                |
| Dunnett's multiple comparisons test | <b>P Value</b> | <b>Summary</b> |
|                                     |                |                |
| 0 mg/ml group                       |                |                |
| Void vs. ATG5 <sup>KD</sup> #1      | 0.005          | **             |
| Void vs. ATG5 <sup>KD</sup> #2      | 0.0013         | **             |
|                                     |                |                |
| 0.4 mg/ml group                     |                |                |
| Void vs. ATG5 <sup>KD</sup> #1      | <0.001         | ***            |
| Void vs. ATG5 <sup>KD</sup> #2      | <0.001         | ***            |
|                                     |                |                |
| 0.8 mg/ml group                     |                |                |
| Void vs. ATG5 <sup>KD</sup> #1      | <0.001         | ***            |
| Void vs. ATG5 <sup>KD</sup> #2      | <0.001         | ***            |
|                                     |                |                |
| (B) LC3-II/LC3-I ratio              |                |                |
| Dunnett's multiple comparisons test | <b>P Value</b> | <b>Summary</b> |
|                                     |                |                |
| 0 mg/ml group                       |                |                |
| Void vs. ATG5 <sup>KD</sup> #1      | 0.9659         | ns             |
| Void vs. ATG5 <sup>KD</sup> #2      | 0.8892         | ns             |
|                                     |                |                |
| 0.4 mg/ml group                     |                |                |
| Void vs. ATG5 <sup>KD</sup> #1      | 0.2524         | ns             |

|                                     |                |                |
|-------------------------------------|----------------|----------------|
| Void vs. ATG5 <sup>KD</sup> #2      | 0.1786         | ns             |
| 0.8 mg/ml group                     |                |                |
| Void vs. ATG5 <sup>KD</sup> #1      | 0.0076         | **             |
| Void vs. ATG5 <sup>KD</sup> #2      | 0.0233         | *              |
| (C) COX-1/GAPDH ratio               |                |                |
| Dunnett's multiple comparisons test | <b>P Value</b> | <b>Summary</b> |
| 0 mg/ml group vs. 0.4 mg/ml group   | 0.1785         | ns             |
| 0 mg/ml group vs. 0.8 mg/ml group   | 0.0295         | *              |

**Table S5. The quantification of IHC or staining analysis.**

| <b>IRE1<math>\alpha</math></b> | <b>sham group</b> |           | <b>0.2 mg/day group</b> |           | <b>0.4 mg/day group</b> |           |
|--------------------------------|-------------------|-----------|-------------------------|-----------|-------------------------|-----------|
|                                | <b>Mean</b>       | <b>SD</b> | <b>Mean</b>             | <b>SD</b> | <b>Mean</b>             | <b>SD</b> |
| <b>% Area</b>                  |                   |           |                         |           |                         |           |
| 4W                             | 12.84             | 5.35      | 14.85                   | 4.79      | 26.80*                  | 5.98      |
| 8W                             | 12.98             | 4.86      | 18.18                   | 3.48      | 26.19                   | 3.10      |
| <b>COX-1</b>                   | <b>sham group</b> |           | <b>0.2 mg/day group</b> |           | <b>0.4 mg/day group</b> |           |
|                                | <b>Mean</b>       | <b>SD</b> | <b>Mean</b>             | <b>SD</b> | <b>Mean</b>             | <b>SD</b> |
| <b>% Area</b>                  |                   |           |                         |           |                         |           |
| 4W                             | 8.25              | 6.29      | 11.63                   | 5.75      | 19.14                   | 4.39      |
| 8W                             | 9.99              | 6.82      | 15.68                   | 3.04      | 25.54*                  | 1.67      |
| <b>LC3</b>                     | <b>sham group</b> |           | <b>0.2 mg/day group</b> |           | <b>0.4 mg/day group</b> |           |
|                                | <b>Mean</b>       | <b>SD</b> | <b>Mean</b>             | <b>SD</b> | <b>Mean</b>             | <b>SD</b> |
| <b>% Area</b>                  |                   |           |                         |           |                         |           |
| 4W                             | 11.27             | 4.34      | 13.73                   | 7.82      | 15.94                   | 1.34      |
| 8W                             | 7.63              | 4.78      | 13.73                   | 5.23      | 21.45*                  | 1.13      |
| <b>MTS</b>                     | <b>sham group</b> |           | <b>0.2 mg/day group</b> |           | <b>0.4 mg/day group</b> |           |
|                                | <b>Mean</b>       | <b>SD</b> | <b>Mean</b>             | <b>SD</b> | <b>Mean</b>             | <b>SD</b> |
| <b>% Area</b>                  |                   |           |                         |           |                         |           |
| 8W                             | 91.00             | 0.16      | 80.15                   | 10.12     | 66.53*                  | 11.56     |
| <b>Dystrophin</b>              | <b>sham group</b> |           | <b>0.2 mg/day group</b> |           | <b>0.4 mg/day group</b> |           |
|                                | <b>Mean</b>       | <b>SD</b> | <b>Mean</b>             | <b>SD</b> | <b>Mean</b>             | <b>SD</b> |
| <b>% Area</b>                  |                   |           |                         |           |                         |           |
| 8W                             | 1.14              | 0.39      | 0.14*                   | 0.03      | 0.19*                   | 0.15      |

Data are presented as the mean  $\pm$  SD. N=2, 10 fields of view per kidney. \*P < 0.05, compared with sham group as determined by two-way ANOVA with Dunnett's multiple comparison test.

## Supplementary figures

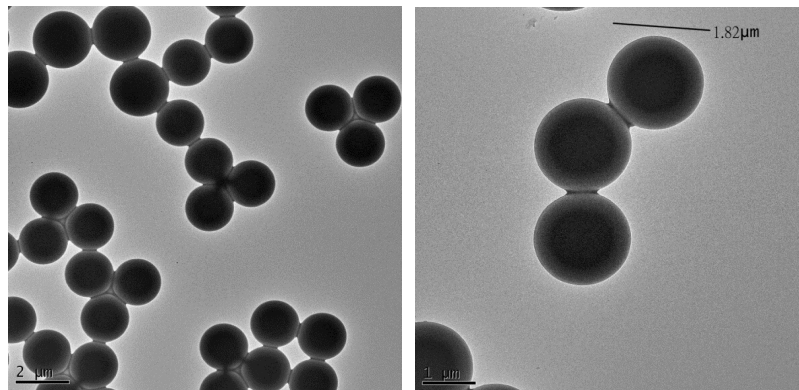

**Figure S1. PS-MPs characterization.** The diameter of PS-MPs was detected with TEM.

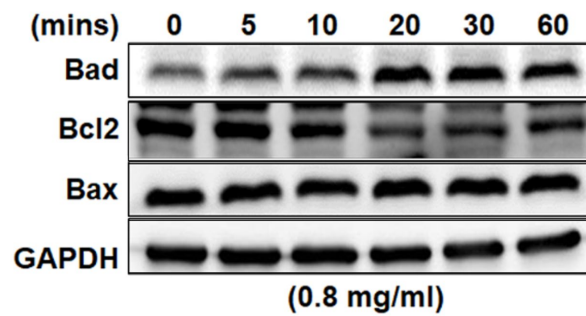

**Figure S2. Representative Western blots evaluating Bax, Bad, and Bcl2 in HK-2 cells treated with PS-MPs** Bad, Bcl2 and Bax were assessed after PS-MPs treatment at a concentration of 0.8 mg/ml for 0, 5, 10, 20, 30, 60 min. The mean and SD summary data for quantification of Western blots are shown in Table S3.

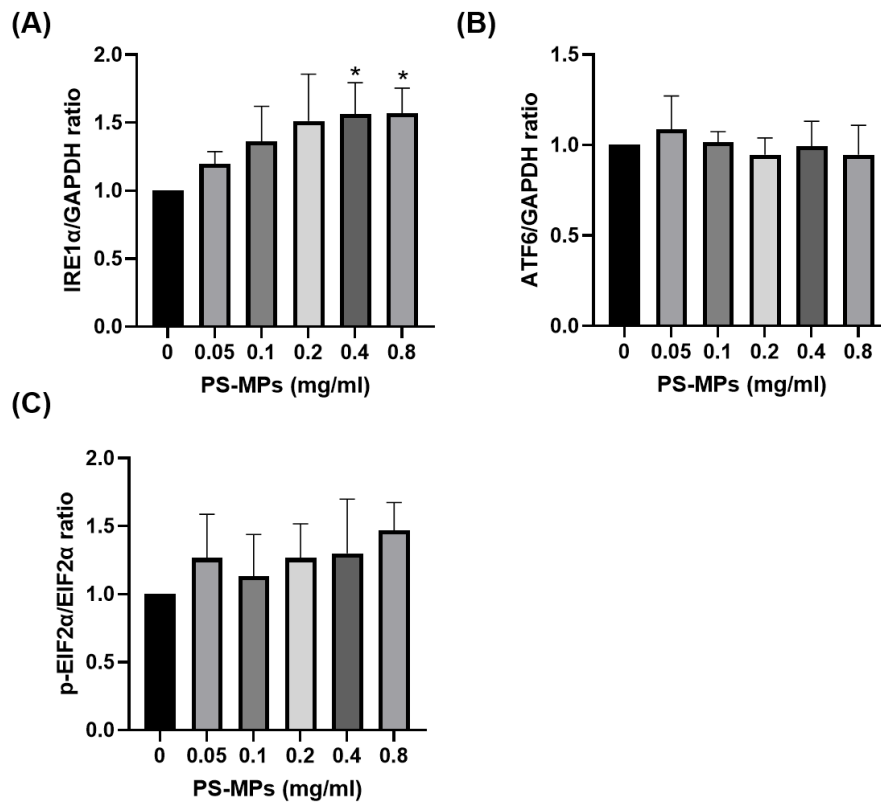

**Figure S3. Quantification of Western blots evaluating IRE1 $\alpha$ , ATF6, and p-EIF2 $\alpha$  in HK-2 cells treated with PS-MPs.** ER stress-related proteins IRE1 $\alpha$ , ATF6, p-EIF2 $\alpha$ , and EIF2 $\alpha$ , were assessed after PS-MPs treatment at concentrations of 0.05, 0.1, 0.2, 0.4 and 0.8 mg/ml for 24 h. The Western blotting results were graphed and statistically analyzed. (A) IRE1 $\alpha$ /GAPDH ratio. (B) ATF6/GAPDH ratio. (C) p-EIF2 $\alpha$ / EIF2 $\alpha$  ratio. N=3. Data are presented as the mean  $\pm$  SD. \*P < 0.05 compared with control group as determined by one-way ANOVA with Dunnett's multiple comparison test, IRE1 $\alpha$ /GAPDH, 0 mg/ml group vs 0.8 mg/ml group. The mean and SD summary data for quantification of Western blots are shown in Table S3. The actual P-values for non-statistically and statistically significant results are shown in Table S4.



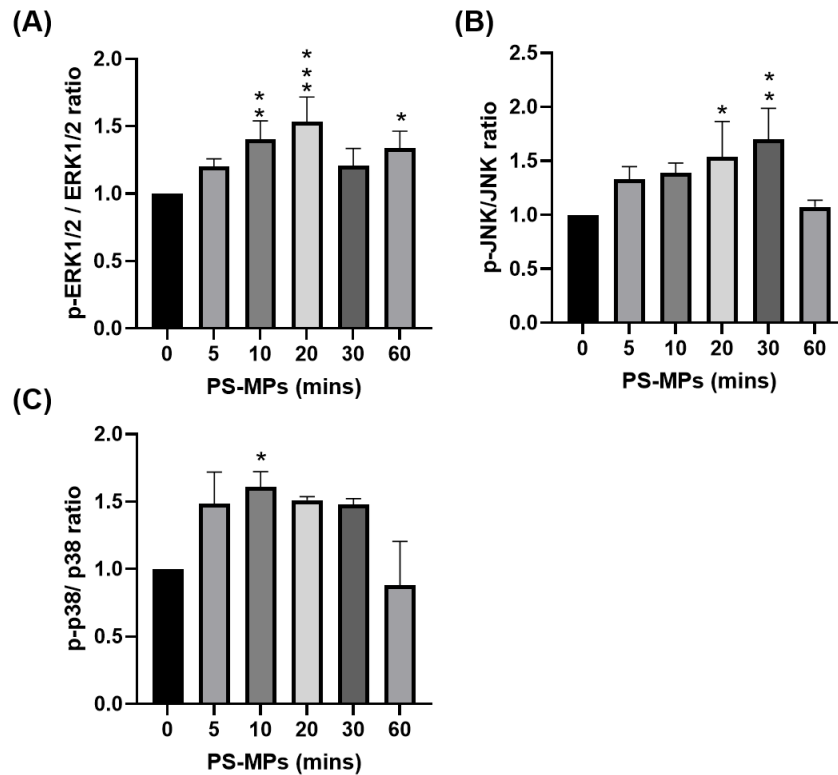

**Figure S4. Quantification of Western blots evaluating the phosphorylation of MAPK signaling pathway components ERK1/2, JNK, and p38 in HK-2 cells treated with PS-MPs.**

MAPK signaling pathway components, such as p-ERK1/2, ERK1/2, p-JNK, JNK, p-p38 and, p38, were assessed after PS-MPs treatment at a concentration of 0.8 mg/ml for 0, 5, 10, 20, 30, 60 min. The Western blotting results were graphed and statistically analyzed. (A) p-ERK1/2/ERK1/2 ratio, N=3. (B) p-JNK/JNK ratio, N=3. (C) p-p38/ p-p38 ratio, N=2. Data are presented as the mean  $\pm$  SD. \*P < 0.05, \*\*P < 0.01, and \*\*\*P < 0.001 compared with control group as determined by one-way ANOVA with Dunnett's multiple comparison test. The mean and SD summary data for quantification of Western blots are shown in Table S3. The actual P-values for non-statistically and statistically significant results have shown in Table S4.

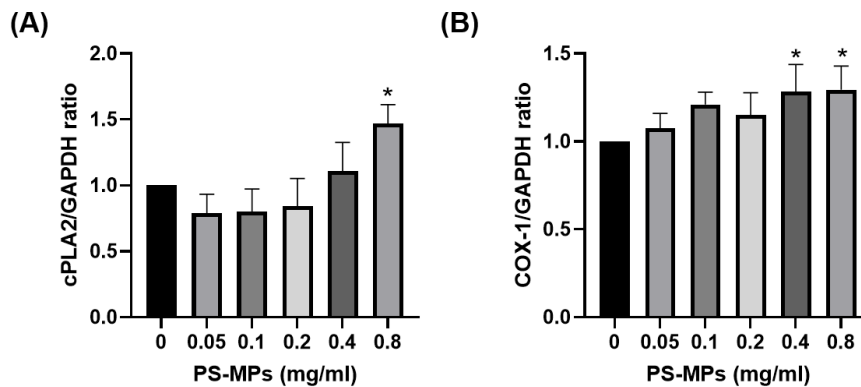

**Figure S5. Quantification of Western blots evaluating cPLA2 and COX-1 in HK-2 cells treated with PS-MPs.** Inflammation-related proteins cPLA2 and COX-1, were assessed after PS-MPs treatment at concentrations of 0.05, 0.1, 0.2, 0.4 and 0.8 mg/ml for 24 h. The Western blotting results were graphed and statistically analyzed. (A) cPLA2/GAPDH ratio. (B) COX-1/GAPDH ratio. N=3. Data are presented as the mean  $\pm$  SD. \*P < 0.05 compared with control group as determined by one-way ANOVA with Dunnett's multiple comparison test. The mean and SD summary data for quantification of Western blots are shown in Table S3. The actual P-values for non-statistically and statistically significant results have shown in Table S4.

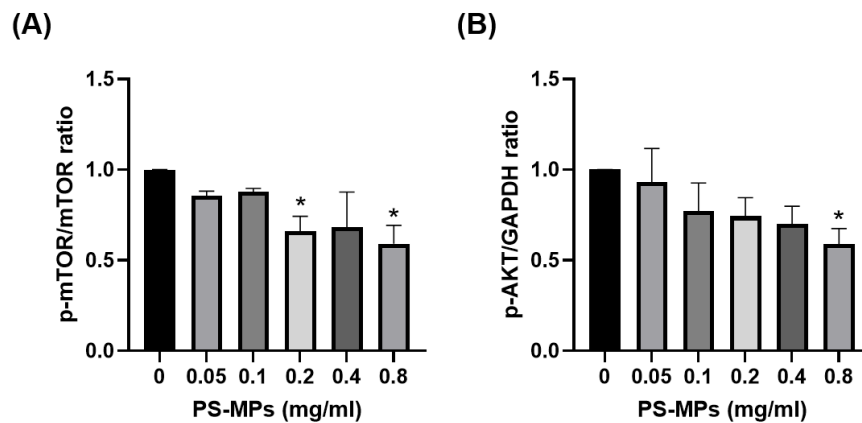

**Figure S6. Quantification of Western blots evaluating the phosphorylation of mTOR and**

**Akt in HK-2 cells treated with PS-MPs.** AKT/mTOR signaling pathway components, such

as p-mTOR, mTOR, p-AKT, and AKT, were assessed after PS-MPs treatment at

concentrations of 0.05, 0.1, 0.2, 0.4 and 0.8 mg/ml for 1 h. The Western blotting results were

graphed and statistically analyzed. (A) p-mTOR/mTOR ratio. (B) p-AKT/AKT ratio. N=2.

Data are presented as the mean  $\pm$  SD. \*P < 0.05 compared with control group as determined

by one-way ANOVA with Dunnett's multiple comparison test. The mean and SD summary

data for quantification of Western blots are shown in Table S3. The actual P-values for non-

statistically and statistically significant results have shown in Table S4.

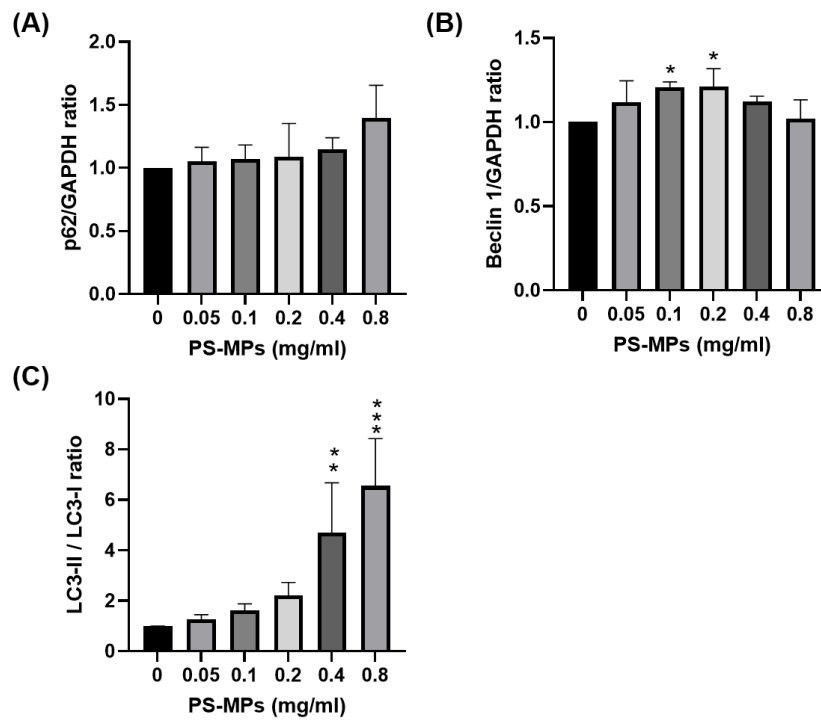

**Figure S7. Quantification of Western blots evaluating the expression of p62, Beclin 1, and LC3 in HK-2 cells treated with PS-MPs.** Autophagy-related proteins p62, Beclin 1, and LC3, were assessed after PS-MPs treatment at concentrations of 0.05, 0.1, 0.2, 0.4 and 0.8 mg/ml for 24 h. The Western blotting results were graphed and statistically analyzed. (A) p62/GAPDH ratio. (B) Beclin 1/GAPDH ratio. (C) LC3-II/LC3-I ratio. N=3. Data are presented as the mean  $\pm$  SD. \*P < 0.05, \*\*P < 0.01, and \*\*\*P < 0.001 compared with control group as determined by one-way ANOVA with Dunnett's multiple comparison test. The mean and SD summary data for quantification of Western blots are shown in Table S3. The actual P-values for non-statistically and statistically significant results have shown in Table S4.

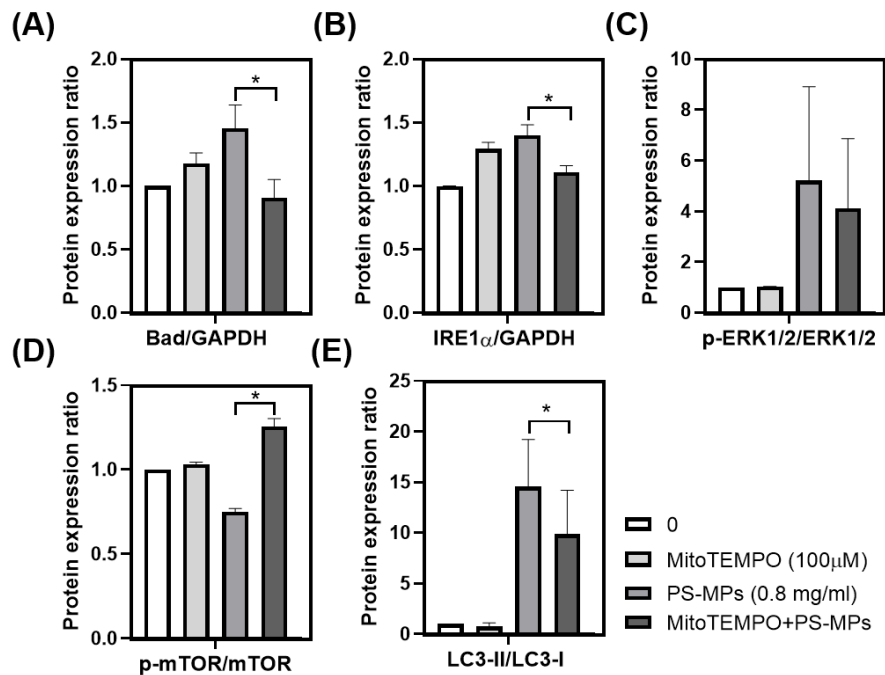

**Figure S8. Quantification of Western blots evaluating the expression Bad, IRE1 $\alpha$ , p-ERK1/2, p-mTOR, and LC3-II/LC3-I ratio in HK-2 cells treated with PS-MPs alone, MitoTEMPO alone or in combination.** (A) Cells were pretreated for 1 h with MitoTEMPO (100  $\mu$ M) then exposed to PS-MPs (0.8 mg/ml) for 20 min. Mitochondrial-mediated apoptosis protein Bad was assessed. (B) Cells were pretreated for 1 h with MitoTEMPO and then exposed to PS-MPs for 24 h. ER stress-related protein IRE1 $\alpha$  was assessed. (C) Cells were pretreated for 1 h with MitoTEMPO for 12 h and exposed to PS-MPs for 30 min. MAPK signaling pathway component p-ERK1/2 and ERK1/2 was assessed. (D) Cells were pretreated for 1 h with MitoTEMPO and then exposed to PS-MPs for 1 h. AKT/mTOR pathway components p-mTOR and mTOR were assessed. (E) Cells were pretreated for 1 h with MitoTEMPO for 1 h

and then exposed to 0.8 mg/ml PS-MPs for 24 h. Autophagy-related protein LC3 was assessed.

The Western blotting results were graphed and statistically analyzed. N=2. Data are presented as the mean  $\pm$  SD. \*P < 0.05 compared with control group as determined by t test. PS-MPs 0.8 mg/ml group vs MitoTEMPO (0  $\mu$ M) group, (A) P=0.0462.

(B) P= 0.0325. (C) P= 0.4509. (D) P= 0.0107. (E) P= 0.0475. The mean and SD summary data for quantification of Western blots are shown in Table S3. The actual P-values for non-statistically and statistically significant results have shown in Table S4.

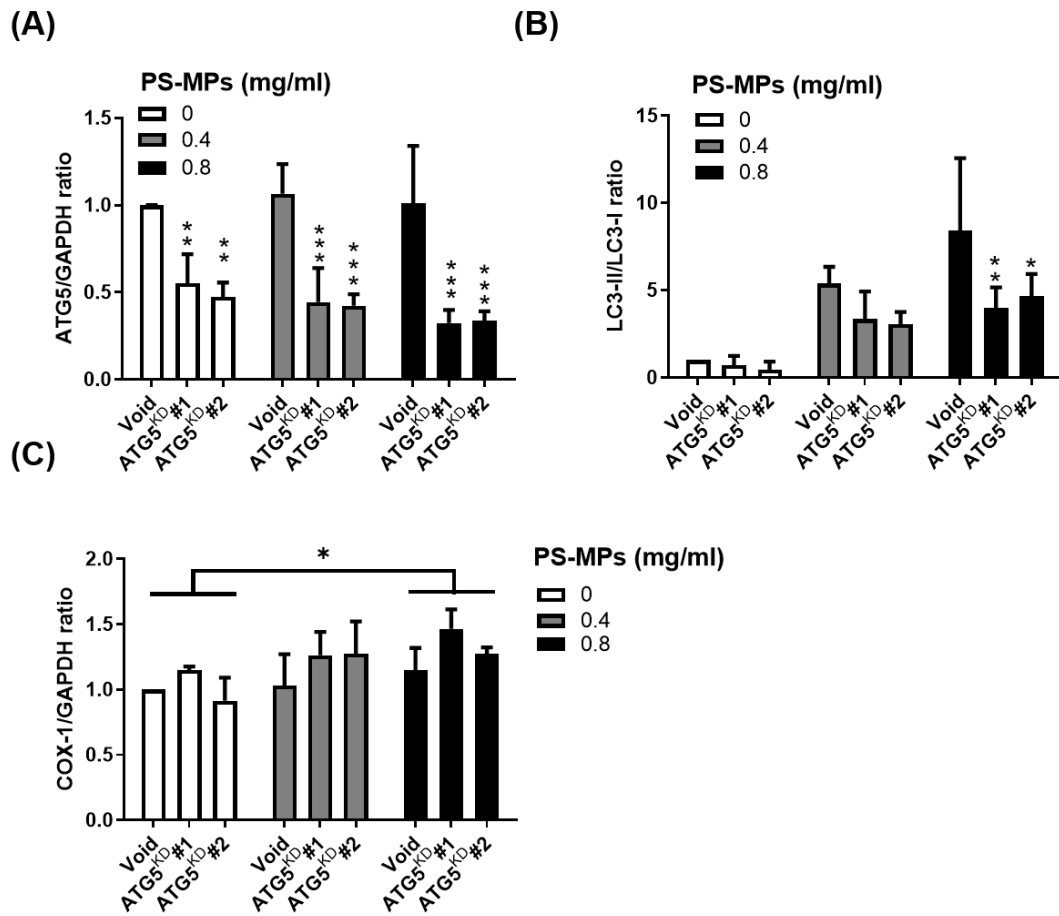

**Figure S9. Quantification of western blot analysis of ATG5 knockdown cells treated with PS-MPs for expression of ATG5, LC3 and COX-1.** Inflammation-related proteins were evaluated after PS-MPs treatment at concentrations of 0.4 and 0.8 mg/ml for 48 h in ATG5<sup>KD</sup> HK-2 cells. The Western blotting results were graphed and statistically analyzed. (A) ATG5/GAPDH ratio, N=3 (B) LC3-II/LC3-I ratio, N=3 (C) COX-1/GAPDH ratio, N=2. Data are presented as the mean  $\pm$  SD. \*P < 0.05, \*\*P < 0.01, and \*\*\*P < 0.001 compared with control group as determined by two-way ANOVA with Dunnett's multiple comparison test. The mean and SD summary data for quantification of Western blots are shown in Table S3. The actual P-values for non-statistically and statistically significant results have shown in Table S4.

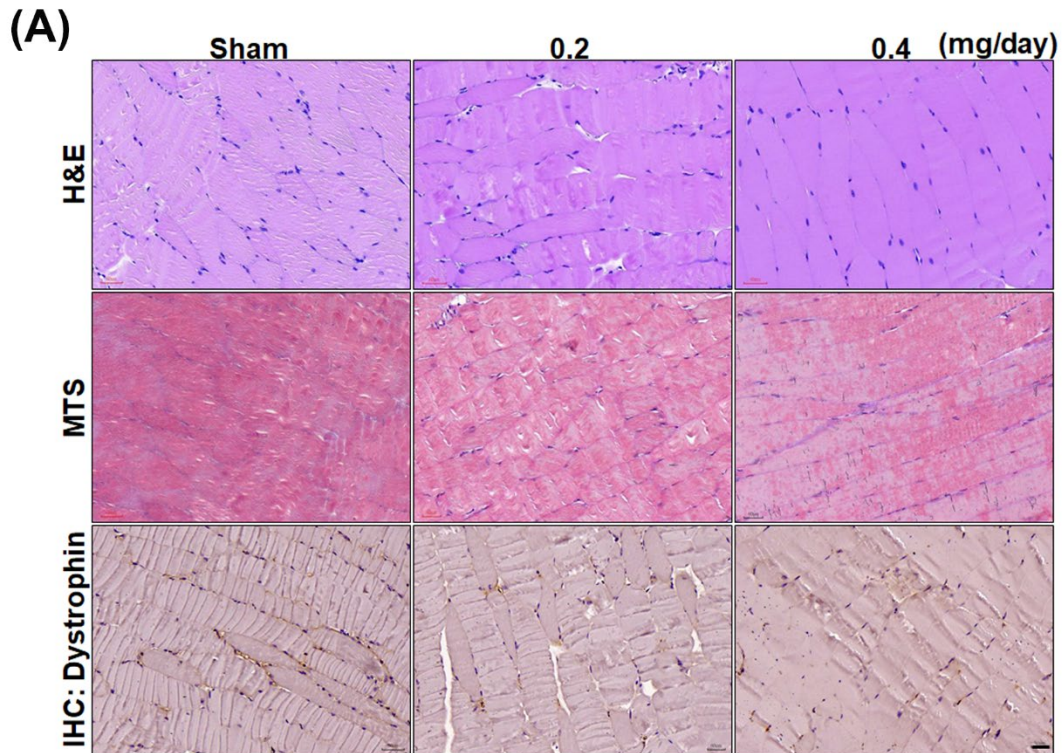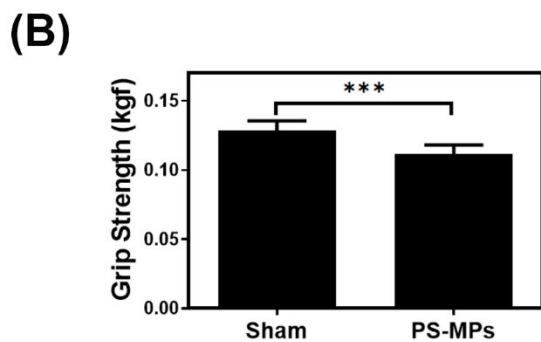

**Figure S10. The effects of PS-MPs on mouse muscle and grip strength.** Six-week-old C57BL/6 male mice without and with 0.2 mg/day and 0.4 mg/day PS-MPs 2 times per week were examined, and the leg muscles of mice were harvested at 8 weeks. (A) Hematoxylin and eosin (H&E) staining, Masson's trichrome staining (MTS), and IHC staining of dystrophin in the muscular sections from mice with or without oral gavage of PS-MPs. Hematoxylin-stained



cell nuclei were blue and eosin-stained the extracellular matrix and cytoplasm were pink. MTS-stained collagen fiber was blue and muscle fiber was red. Muscle fiber and IHC staining of dystrophin were quantified and presented % area. The mean and SD summary data for quantification are shown in Table S5. (B) Handgrip strength in a single-blind test of mice with oral gavage of 0.4 mg/day PS-MPs for 8 weeks before the mice were sacrificed. Data are presented as the mean  $\pm$  SD. N=7, \*\*\*P < 0.001 compared with sham group of mice as determined by t test (Sham group vs PS-MPs group: P<0.001). The mean and SD summary data for handgrip strength are shown in Table S3. Scale bar=60  $\mu$ m.

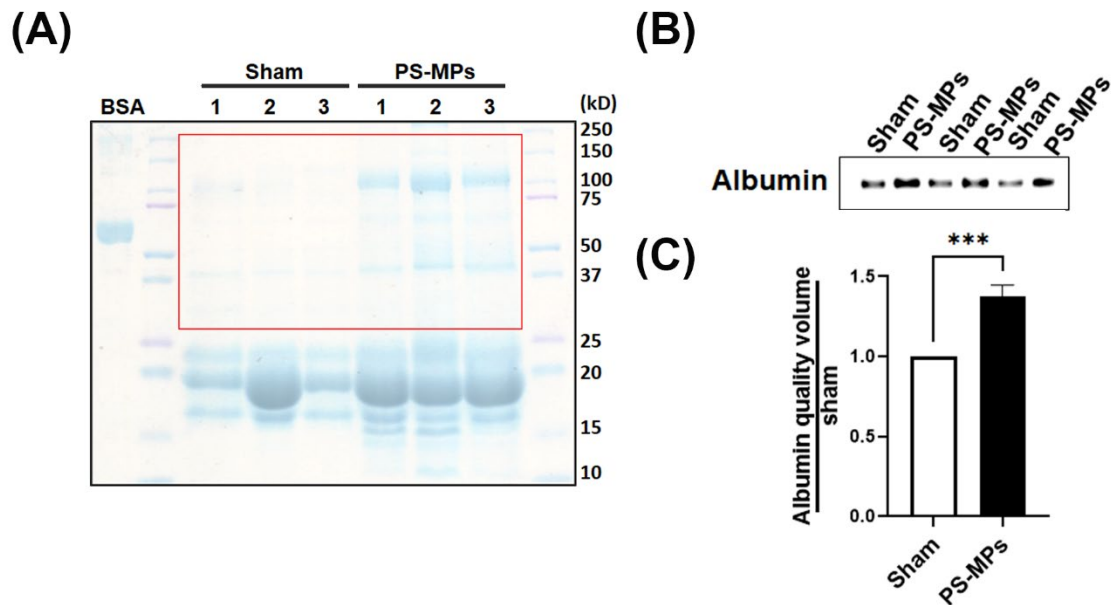

**Figure S11. Protein expression in mouse urine after treatment with PS-MPs.** (A) Sodium dodecyl sulfate–polyacrylamide gel electrophoresis (SDS-PAGE) of urine from the mice was collected after oral gavage of 0.4 mg/day PS-MPs for 4 weeks. The red frame shows the difference between the groups treated with oral gavage of 0.4 mg/day PS-MPs or the sham group. Bovine serum albumin (BSA) is a serum albumin protein derived from cows. N=3. (B) Immunoblotting of urine samples from 3 different mice with albumin at 8 weeks. (C) The Western blotting results were graphed and statistically analyzed. N=3. Data are presented as the mean  $\pm$  SD. \*\*\*P < 0.001 compared with sham group as determined by t test. P < 0.001. The mean and SD summary data for quantification of Western blots are shown in Table S3.
